# Supplementary material for: Chlorophyll fluorescence imaging accurately quantifies freezing damage and cold acclimation responses in Arabidopsis leaves
Source: Springer Nature journal article supplement (doi:10.1186/1746-4811-4-12), 2008-01-01
Supplement: 13007_2008_59_MOESM3_ESM.pdf [file 13007_2008_59_MOESM3_ESM.pdf]

**LT<sub>50</sub> (°C) - IPAM**

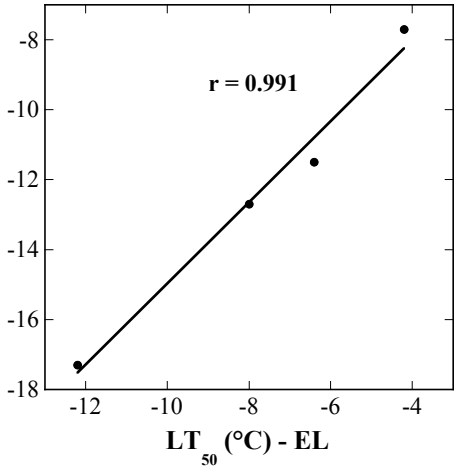

**LT<sub>50</sub> (°C) - EL**
