# Supplementary material for: Chlorophyll fluorescence imaging accurately quantifies freezing damage and cold acclimation responses in Arabidopsis leaves
Source: Springer Nature journal article supplement (doi:10.1186/1746-4811-4-12), 2008-01-01

**24 h incubation**

**no incubation**

**0°C**

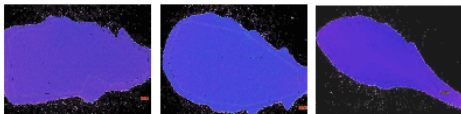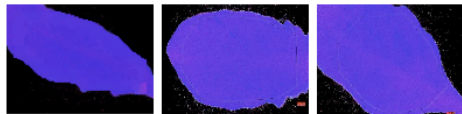

**-6°C**

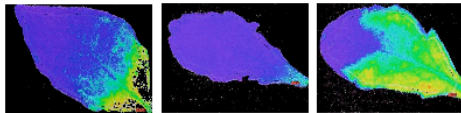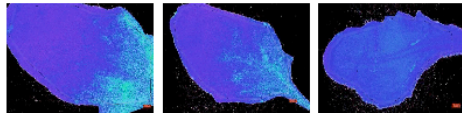

**-8°C**

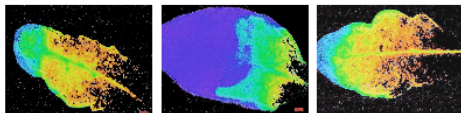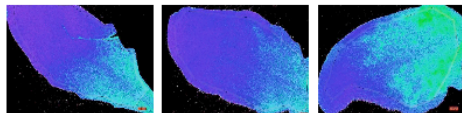

**-10°C**

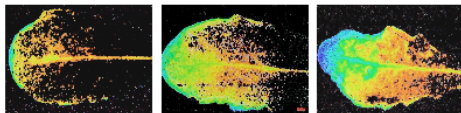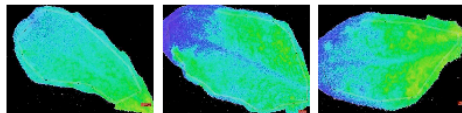

Supplement: 13007_2008_59_MOESM4_ESM.pdf [file 13007_2008_59_MOESM4_ESM.pdf]
